# Supplementary material for: Kinetic and Isotherm Study of As(III) Removal from Aqueous Solution by PET Track-Etched Membranes Loaded with Copper Microtubes
Source: PubMed Central journal article supplement (PMC7914724; doi:10.3390/membranes11020116), 2021-02-06
Supplement: membranes-11-00116-s001.pdf [file membranes-11-00116-s001.pdf]

Supplementary information

# Kinetic and Isotherm Study of As(III) Removal From Aqueous Solution By PET Track-Etched Membranes Loaded with Copper Microtubes

Alyona V. Russakova <sup>1</sup>, Liliya Sh. Altynbaeva <sup>2,3</sup>, Murat Barsbay <sup>4</sup>, Dmitriy A. Zheltov <sup>2</sup>, Maxim V. Zdorovets <sup>2,5,6</sup> and Anastassiya A. Mashentseva <sup>2,3,\*</sup>

<sup>1</sup> The School of Information Technologies and Intelligent Systems, D.Serikbayev East Kazakhstan State Technical University, 070004 Ust-Kamenogorsk, Kazakhstan; Arussakova@gmail.com

<sup>2</sup> The Institute of Nuclear Physics of the Republic of Kazakhstan, 050032 Almaty, Kazakhstan; lilija310378@gmail.com (L.S.A.); zheltovda@gmail.com (D.A.Z.); mzdorovets@gmail.com (M.V.Z.)

<sup>3</sup> Department of Chemistry, L.N. Gumilyov Eurasian National University, 010008 Nur-Sultan, Kazakhstan

<sup>4</sup> Department of Chemistry, Hacettepe University, 06800 Ankara, Turkey; mbarsbay@hacettepe.edu.tr

<sup>5</sup> Department of Intelligent Information Technologies, The Ural Federal University, 620002 Yekaterinburg, Russia

<sup>6</sup> Engineering Profile Laboratory, L.N. Gumilyov Eurasian National University, 010008 Nur-Sultan, Kazakhstan

\* Correspondence: a.mashentseva@inp.kz; Tel.: +7-707-322-4399

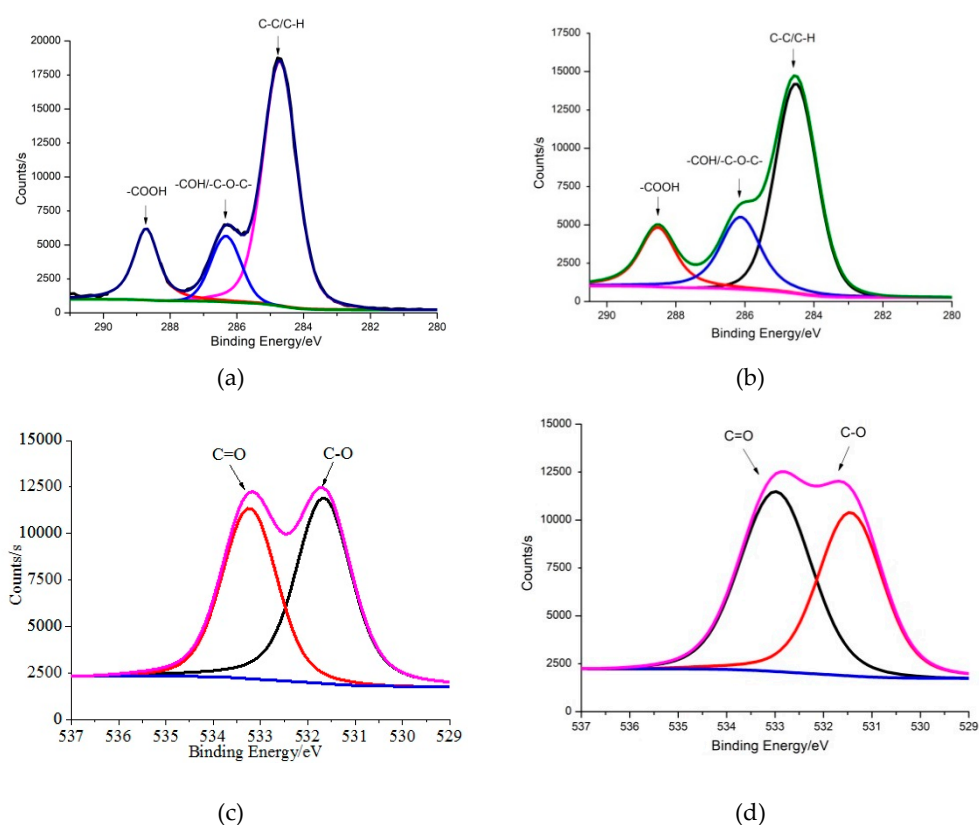

**Figure S1.** XPS high resolution C1s spectra of the "etched-only" (a) and oxidized (b) polyethylene terephthalate (PET) template (b), O1s spectra of the "etched-only" (c) and oxidized (d) PET template.

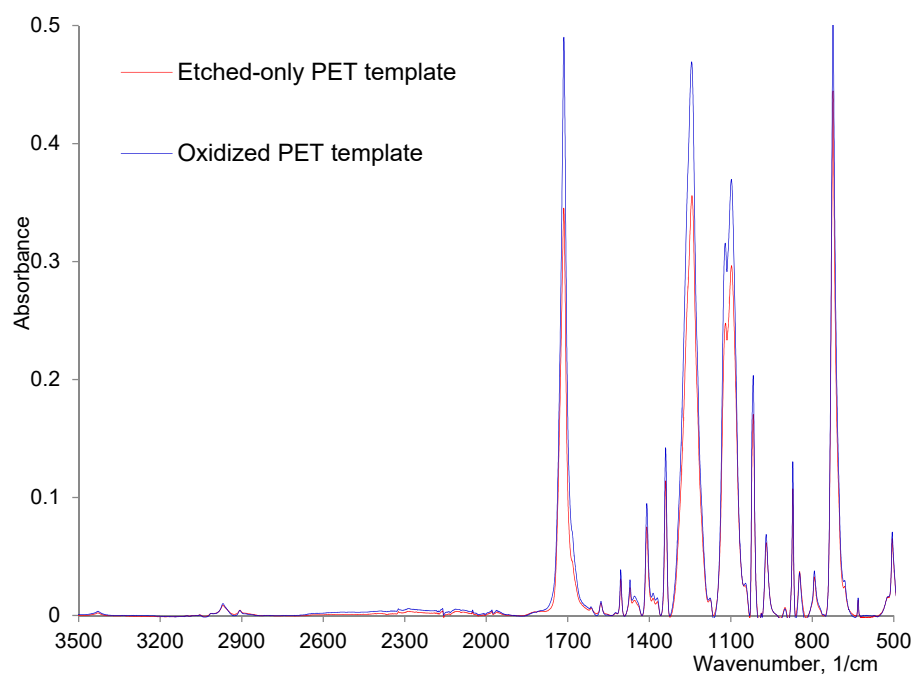

**Figure S2.** Fourier-transform infrared spectroscopy (FTIR) spectra of “etched-only” and oxidized PET templates.

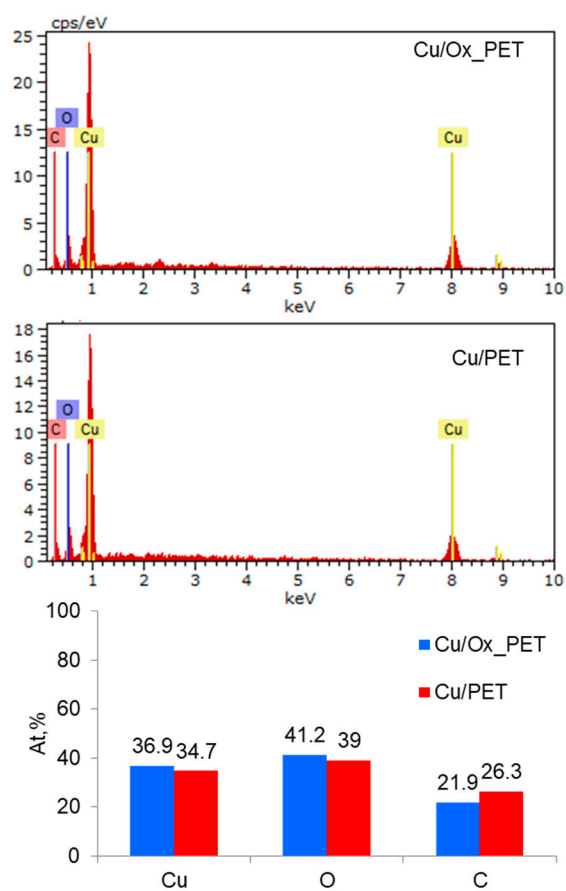

**Figure S3.** An Energy-dispersive X-ray spectroscopy (EDX) spectra with percentage of elements (at.%) for a Cu/PET and Cu/Ox\_PET composite track-etched membrane.
